# Supplementary material for: Phenolics: Occurrence and Immunochemical Detection in Environment and Food
Source: Molecules. 2009 Jan 19;14(1):439–73. doi: 10.3390/molecules14010439 (PMC6253769; doi:10.3390/molecules14010439)
Supplement: Supplementary File 1 [file molecules-14-00439-s001.pdf]

*Correction*

**Correction: Meulenberg, E. P. Phenolics: Occurrence and Immunochemical Detection in Environment and Food. *Molecules* 2009, *14*, 439-473**

**Eline P. Meulenberg \***

ELTI Support VOF, Drieskensacker 12-10, 6546 MH Nijmegen, The Netherlands

\* Author to whom correspondence should be addressed; E-mail: E.Meulenberg@eltisupport.nl

*Received: 3 August 2009 / Published: 13 August 2009*

---

In the original published version of this paper [1], there are two repeated refs. 134 in the reference list. We have now corrected the second ref. 134 to ref. 135, and the remainder should to be renumbered accordingly.

**Reference**

1. Meulenberg, E. P. Phenolics: Occurrence and Immunochemical Detection in Environment and Food. *Molecules* **2009**, *14*, 439-473.

© 2009 by the authors; licensee Molecular Diversity Preservation International, Basel, Switzerland. This article is an open-access article distributed under the terms and conditions of the Creative Commons Attribution license (<http://creativecommons.org/licenses/by/3.0/>).
